# Supplementary material for: Effect of Rho-Associated Kinase Inhibitor and Mesenchymal Stem Cell-Derived Conditioned Medium on Corneal Endothelial Cell Senescence and Proliferation
Source: MDPI journal article supplement (doi:10.3390/cells10061463), 2021-06-11
Supplement: s1 [file s1]

# Effect of Rho-Associated Kinase Inhibitor and Mesenchymal Stem Cell-Derived Conditioned Medium on Corneal Endothelial Cell Senescence and Proliferation

Supplmentary Figure:

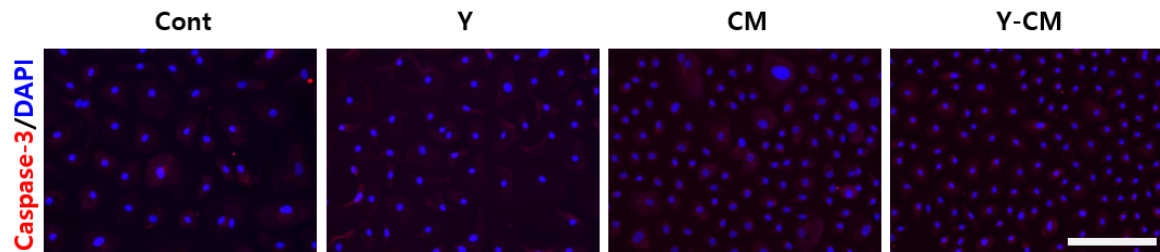

**Figure S1.** Immunofluorescence images of native tissue and in vitro cultured rCECs at passage number 2 culture day 7. Caspase-3 (red) for apoptosis. Nuclei were stained with DAPI (blue) (Scale bar = 100  $\mu$ m).
